# Supplementary material for: Resveratrol Maintains Lipid Metabolism Homeostasis via One of the Mechanisms Associated with the Key Circadian Regulator Bmal1
Source: PubMed Central journal article supplement (PMC6718980; doi:10.3390/molecules24162916), 2019-08-12
Supplement: molecules-24-02916-s001.pdf [file molecules-24-02916-s001.pdf]

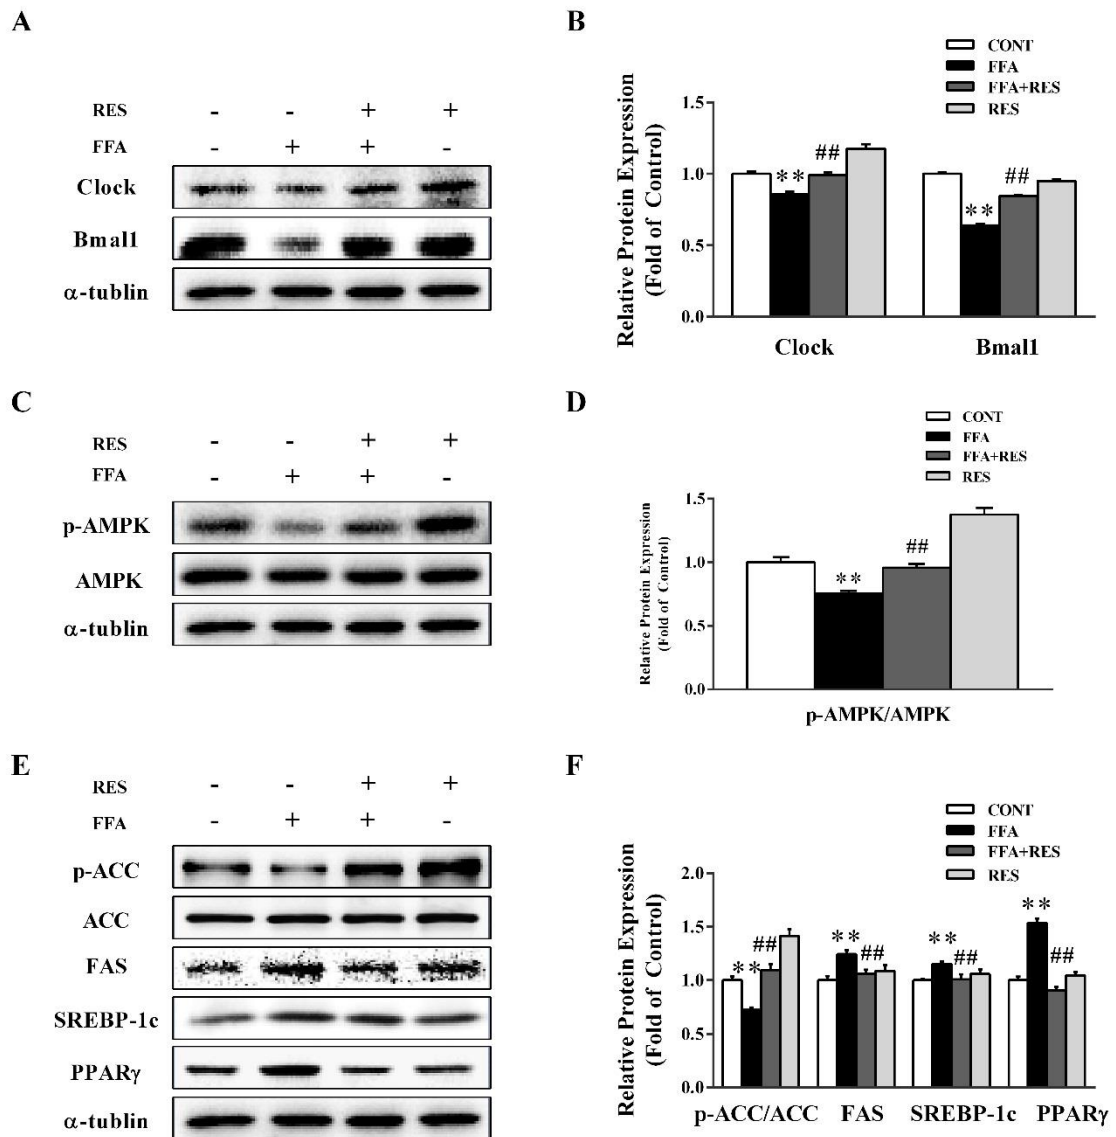

**Figure S1.** RES attenuated FFA-triggered hepatic lipid metabolism unbalance in primary hepatocytes. Primary hepatocytes were pretreated with or without RES (100  $\mu$ M) and treated with FFA (100  $\mu$ M) with 0.1% BSA for 24 h. (A) and (C) The expression levels of Clock, Bmal1, p-AMPK, and total AMPK were detected in cells, and  $\alpha$ -tubulin was used as a loading control. (E) Representative Western blots of p-ACC, FAS, SREBP-1c, and PPAR $\gamma$  after treatment with RES and FFA in primary hepatocytes. (B), (D), and (F) Densitometric analysis of the blots shown in (A), (C), and (E). Data were presented as the mean  $\pm$  SD,  $n \geq 3$ . (\*)  $p < 0.05$  and (\*\*)  $p < 0.01$ , versus control group; (#)  $p < 0.05$  and (##)  $p < 0.01$ , versus FFA group.
